# Supplementary material for: The complete mitochondrial genome of the early flowering plant Nymphaea colorata is highly repetitive with low recombination
Source: PubMed Central journal article supplement (PMC6092842; doi:10.1186/s12864-018-4991-4), 2018-08-14
Supplement: 12864_2018_4991_MOESM1_ESM.pdf [file 12864_2018_4991_MOESM1_ESM.pdf]

Table S1. Repeat proportions of the mitochondrial genomes of 82 angiosperm species.

| Species                      | Small<br>repeat<br>proportion<br>(%) | Medium<br>repeat<br>proportion<br>(%) | Large<br>repeat<br>proportion<br>(%) | Total<br>repeat<br>proportion<br>(%) |
|------------------------------|--------------------------------------|---------------------------------------|--------------------------------------|--------------------------------------|
| <i>Nymphaea colorata</i>     | 3.97                                 | 28.1                                  | 16.82                                | 48.89                                |
| <i>Silene conica</i>         | 20.85                                | 10.71                                 | 10.47                                | 42.03                                |
| <i>Cucurbita pepo</i>        | 27                                   | 11.1                                  | 0                                    | 38.1                                 |
| <i>Daucus carota</i>         | 1.44                                 | 1.42                                  | 33.57                                | 36.43                                |
| <i>Tripsacum dactyloides</i> | 0.91                                 | 1.08                                  | 34.26                                | 36.25                                |
| <i>Gossypiumbarbadense</i>   | 0.67                                 | 1.19                                  | 32.98                                | 34.84                                |
| <i>Zostera marina</i>        | 3.8                                  | 9.54                                  | 20.33                                | 33.67                                |
| <i>Gossypium arboreum</i>    | 0.73                                 | 1.29                                  | 31.03                                | 33.05                                |
| <i>Cucumis sativus</i>       | 17.2                                 | 7.8                                   | 4.35                                 | 29.35                                |
| <i>Gossypium raimondii</i>   | 0.79                                 | 1.82                                  | 25.49                                | 28.1                                 |
| <i>Rhazya stricta</i>        | 0.8                                  | 0.52                                  | 25.58                                | 26.9                                 |
| <i>Gossypium hirsutum</i>    | 0.73                                 | 1.98                                  | 23.57                                | 26.28                                |
| <i>Nelumbo nucifera</i>      | 2.1                                  | 6.41                                  | 17.32                                | 25.83                                |
| <i>Gossypium harknessii</i>  | 0.74                                 | 2.07                                  | 22.94                                | 25.75                                |
| <i>Sorghum bicolor</i>       | 1.07                                 | 1.09                                  | 21.69                                | 23.85                                |
| <i>Amborella trichopoda</i>  | 9.1                                  | 13.8                                  | 0.14                                 | 23.04                                |
| <i>Beta macrocarpa</i>       | 1.63                                 | 3.44                                  | 17.28                                | 22.35                                |
| <i>Beta vulgaris</i>         | 2                                    | 3.18                                  | 15.93                                | 20.74                                |
| <i>Zea mays</i>              | 1.36                                 | 2                                     | 16.91                                | 20.27                                |
| <i>Hyoscyamus niger</i>      | 1.62                                 | 4.63                                  | 13.81                                | 20.06                                |
| <i>Gossypium davidsonii</i>  | 0.88                                 | 2.04                                  | 15.59                                | 18.51                                |

|                                |      |       |       |       |
|--------------------------------|------|-------|-------|-------|
| <i>Gossypium trilobum</i>      | 0.86 | 2.05  | 15.59 | 18.5  |
| <i>Glycine max</i>             | 0.55 | 2.83  | 14.72 | 18.1  |
| <i>Nicotiana sylvestris</i>    | 1.41 | 1.64  | 14.94 | 17.99 |
| <i>Nicotiana tabacum</i>       | 1.41 | 1.63  | 14.95 | 17.99 |
| <i>Erythranthe guttata</i>     | 0.92 | 0.98  | 15.65 | 17.55 |
| <i>Silene vulgaris</i>         | 1.5  | 2.26  | 13.32 | 17.08 |
| <i>Capsicum annuum</i>         | 1.79 | 1.73  | 13.55 | 17.07 |
| <i>Aegilops speltoides</i>     | 0.99 | 1.54  | 14.51 | 17.04 |
| <i>Zea perennis</i>            | 1.46 | 1.47  | 13.99 | 16.92 |
| <i>Triticum aestivum</i>       | 1.25 | 1.75  | 13.83 | 16.83 |
| <i>Cocos nucifera</i>          | 0.81 | 2.57  | 12.67 | 16.05 |
| <i>Triticum timopheevii</i>    | 1.09 | 2.8   | 11.53 | 15.42 |
| <i>Lotus japonicus</i>         | 0.87 | 1.9   | 12.3  | 15.07 |
| <i>Corchorus capsularis</i>    | 5.81 | 3.25  | 5.76  | 14.82 |
| <i>Saccharum officinarum</i>   | 0.74 | 0.54  | 13.01 | 14.29 |
| <i>Geranium maderense</i>      | 3.65 | 10.11 | 0.45  | 14.21 |
| <i>Millettia pinnata</i>       | 1.47 | 0.41  | 11.94 | 13.82 |
| <i>Liriodendron tulipifera</i> | 1.91 | 2.35  | 8.78  | 13.04 |
| <i>Raphanus sativus</i>        | 2.15 | 3.12  | 7.53  | 12.8  |
| <i>Arabidopsis thaliana</i>    | 1.39 | 5.21  | 5.88  | 12.48 |
| <i>Helianthus annuus</i>       | 1.1  | 2.47  | 8.6   | 12.17 |
| <i>Sinapis arvensis</i>        | 2.18 | 3.42  | 6.42  | 12.02 |
| <i>Spinacia oleracea</i>       | 3.69 | 1.8   | 5.03  | 10.52 |
| <i>Stratiotes aloides</i>      | 9.19 | 1.08  | 0     | 10.27 |
| <i>Zea luxurians</i>           | 1.73 | 1.6   | 6.88  | 10.21 |
| <i>Brassica nigra</i>          | 2.42 | 1.87  | 5.66  | 9.95  |
| <i>Brassica carinata</i>       | 2.29 | 1.87  | 5.66  | 9.82  |
| <i>Utricularia reniformis</i>  | 2.01 | 0.65  | 6.61  | 9.27  |
| <i>Butomus umbellatus</i>      | 0.89 | 1.92  | 6.2   | 9.01  |
| <i>Ipomoea nil</i>             | 1.98 | 6.53  | 0     | 8.51  |
| <i>Hibiscus cannabinus</i>     | 1.14 | 2.98  | 4.38  | 8.5   |

|                                  |      |      |      |      |
|----------------------------------|------|------|------|------|
| <i>Carica papaya</i>             | 1.53 | 1.97 | 4.66 | 8.16 |
| <i>Lagerstroemia indica</i>      | 5.99 | 2.09 | 0    | 8.08 |
| <i>Salvia miltiorrhiza</i>       | 1.54 | 2.67 | 3.56 | 7.77 |
| <i>Brassica napus</i>            | 2.23 | 2.76 | 2.19 | 7.18 |
| <i>Malus domestica</i>           | 1.36 | 2.91 | 2.89 | 7.16 |
| <i>Citrullus lanatus</i>         | 1.58 | 1.73 | 3.84 | 7.15 |
| <i>Brassica juncea</i>           | 2.34 | 2.24 | 2.21 | 6.79 |
| <i>Brassica rapa</i>             | 2.34 | 2.24 | 2.21 | 6.79 |
| <i>Salix suchowensis</i>         | 1.13 | 0.75 | 4.84 | 6.72 |
| <i>Allium cepa</i>               | 2.54 | 1.51 | 2.2  | 6.25 |
| <i>Silene latifolia</i>          | 0.67 | 0.42 | 4.93 | 6.02 |
| <i>Diplostegium hartwegii</i>    | 1.35 | 3.47 | 1.04 | 5.86 |
| <i>Castilleja paramensis</i>     | 1.11 | 1.17 | 3.55 | 5.83 |
| <i>Vaccinium macrocarpon</i>     | 1.86 | 2.43 | 1.21 | 5.5  |
| <i>Hesperelaea palmeri</i>       | 1.09 | 1.38 | 2.42 | 4.89 |
| <i>Vitis vinifera</i>            | 1.38 | 2.35 | 0.5  | 4.23 |
| <i>Ziziphus jujuba</i>           | 1.31 | 2.25 | 0    | 3.56 |
| <i>Viscum album</i>              | 2.11 | 1.44 | 0    | 3.55 |
| <i>Vigna angularis</i>           | 0.87 | 2.46 | 0    | 3.33 |
| <i>Cannabis sativa</i>           | 1.6  | 1.62 | 0    | 3.22 |
| <i>Asclepias syriaca</i>         | 0.74 | 2.07 | 0.36 | 3.17 |
| <i>Spirodela polyrhiza</i>       | 1.08 | 2.05 | 0    | 3.13 |
| <i>Dorcocheras hygrometricum</i> | 0.8  | 1.63 | 0.58 | 3.01 |
| <i>Phoenix dactylifera</i>       | 0.89 | 1.79 | 0.33 | 3.01 |
| <i>Batis maritima</i>            | 1.46 | 1.4  | 0    | 2.86 |
| <i>Populus davidiana</i>         | 1.23 | 1.33 | 0    | 2.56 |
| <i>Medicago truncatula</i>       | 1.51 | 0.52 | 0    | 2.03 |
| <i>Salix purpurea</i>            | 1.07 | 0.91 | 0    | 1.98 |
| <i>Vigna radiata</i>             | 0.92 | 1.06 | 0    | 1.98 |
| <i>Ajuga reptans</i>             | 0.91 | 0.37 | 0    | 1.28 |
