# Supplementary material for: The complete mitochondrial genome of the early flowering plant Nymphaea colorata is highly repetitive with low recombination
Source: PubMed Central journal article supplement (PMC6092842; doi:10.1186/s12864-018-4991-4), 2018-08-14

**Figure S3. The DNA and RNA coverage plots of the *cox2* gene of the mitochondrial genome of *Nymphaea colorata* (KY889142).**

### The PacBio DNA read coverage plot

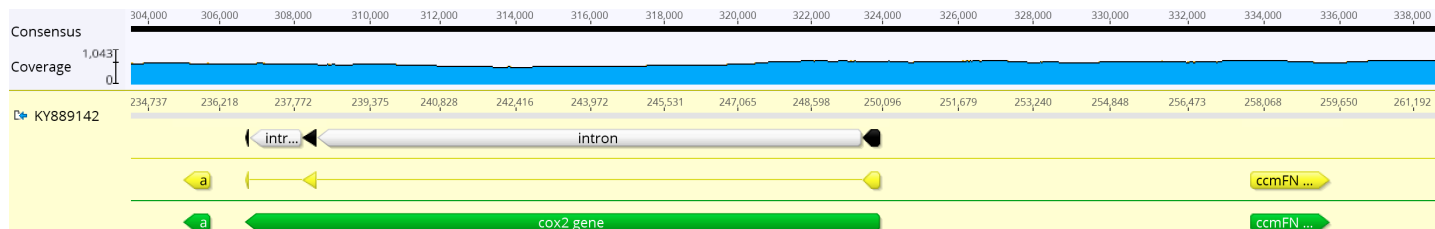

### The RNA-seq read coverage plot

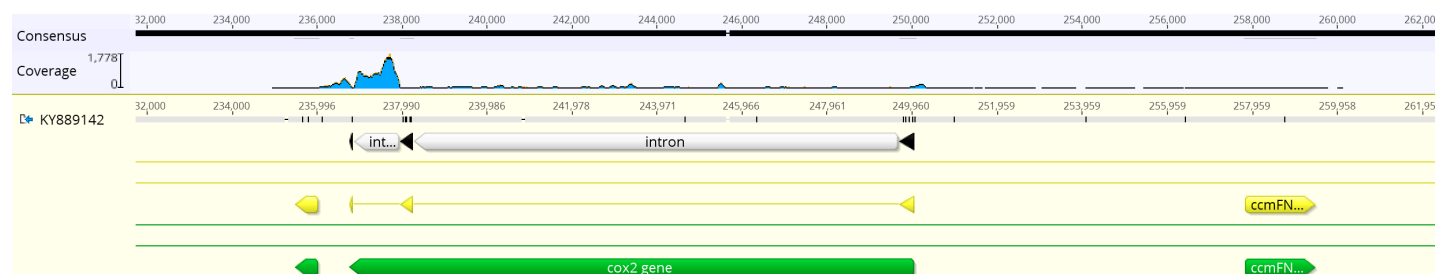

Supplement: 12864_2018_4991_MOESM2_ESM.pdf [file 12864_2018_4991_MOESM2_ESM.pdf]
