# Supplementary material for: The complete mitochondrial genome of the early flowering plant Nymphaea colorata is highly repetitive with low recombination
Source: PubMed Central journal article supplement (PMC6092842; doi:10.1186/s12864-018-4991-4), 2018-08-14

**Figure S4. The conserved domain alignment of the group II intron *cox2i373* of *Triticum timopheevii* (AP013106) and *Nymphaea colorata* (KY889142).**

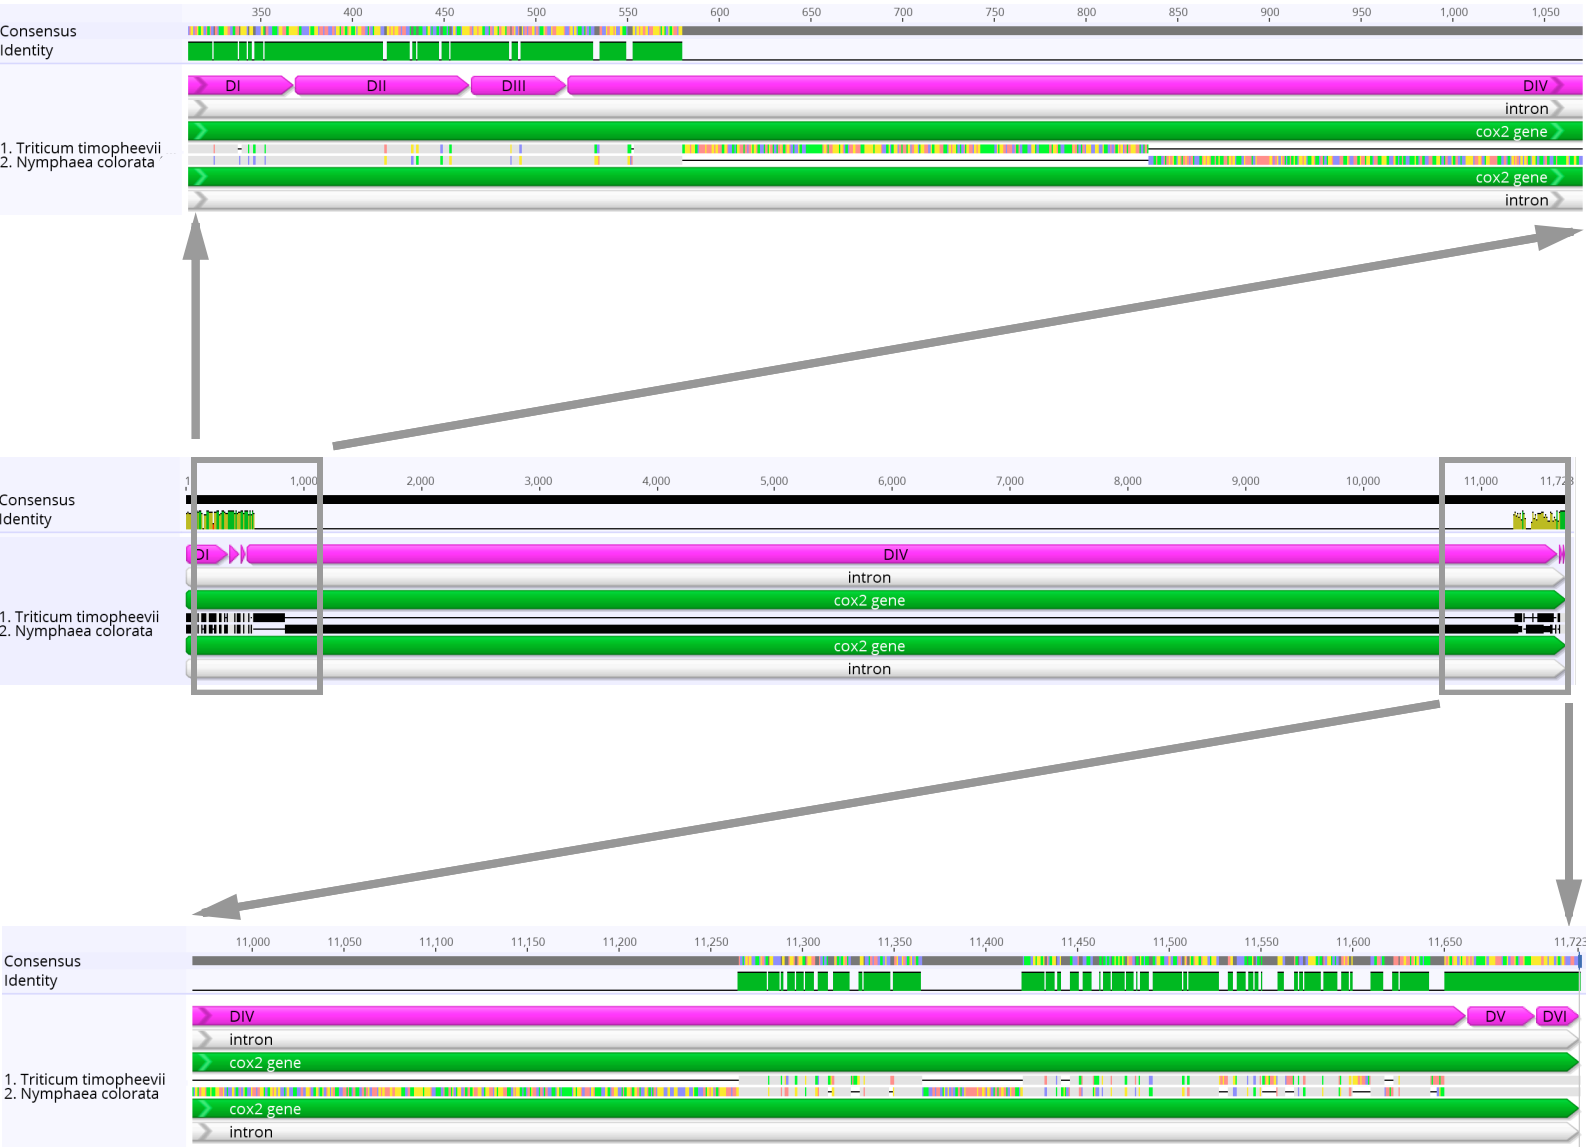

Supplement: 12864_2018_4991_MOESM3_ESM.pdf [file 12864_2018_4991_MOESM3_ESM.pdf]
