# Supplementary material for: The complete mitochondrial genome of the early flowering plant Nymphaea colorata is highly repetitive with low recombination
Source: PubMed Central journal article supplement (PMC6092842; doi:10.1186/s12864-018-4991-4), 2018-08-14
Supplement: 12864_2018_4991_MOESM8_ESM.pdf [file 12864_2018_4991_MOESM8_ESM.pdf]

Table S3. Eleven conserved gene clusters in *Nymphaea* mitochondrial genome.

| No. | Conserved gene clusters      | Distribution <sup>a</sup>                                  |
|-----|------------------------------|------------------------------------------------------------|
| 1   | rpl2–rps19–rps3–rpl16        | Bacteria                                                   |
| 2   | rps13–rps11                  | Bacteria                                                   |
| 3   | rrn18–rrn5                   | Bacteria                                                   |
| 4   | trnfM(CAT)–rrn26             | Streptophytes                                              |
| 5   | cox3–sdh4                    | Seed plants                                                |
| 6   | nad3–rps12                   | Seed plants                                                |
| 7   | rpl5–rps14–cob               | Seed plants                                                |
| 8   | rps10–cox1                   | Seed plants                                                |
| 9   | trnP(TGG)–sdh3               | Viridiplantae to basal angiosperms                         |
| 10  | trnP(TGG)-cp–trnW(CAA)-cp    | Angiosperms but not in <i>Amborella</i>                    |
| 11  | <nad5.x4.x5><trnE(TTC)–nad7> | <i>Nymphaea</i> , <i>Liriodendron</i> , and <i>Nelumbo</i> |

<sup>a</sup> exceptions are tolerated in each of the distribution range listed below.
